# Supplementary material for: Antibiotic-Mediated Selection of Quorum-Sensing-Negative Staphylococcus aureus
Source: PubMed Central journal article supplement — mBio. 2012 Nov 13;3(6):e00459-12. doi: 10.1128/mBio.00459-12 (PMC3509436; doi:10.1128/mbio.00459-12), 2012-11-13
Supplement: mbo006121379sf01.pdf [file mbo006121379sf01.pdf]

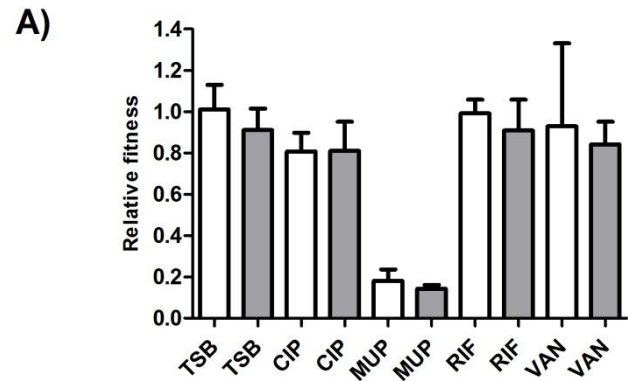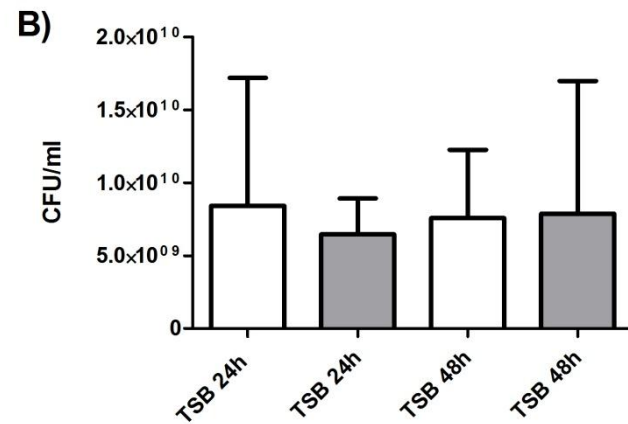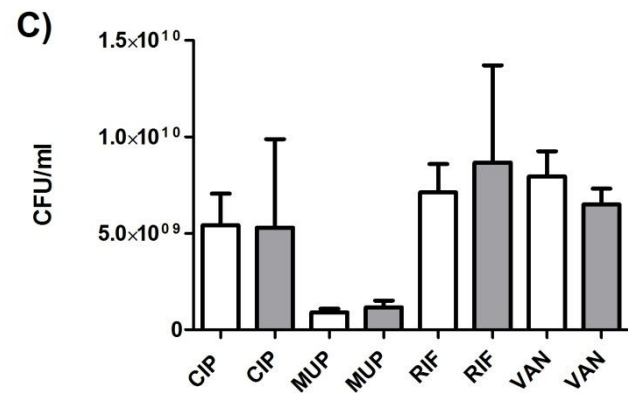

**Figure S1: Effect of agr status on exponential growth and CFU**

**in stationary growth phase. A)** Relative fitness measured in the

exponential growth phase for the WT (white bars) and the

$\Delta$ agrA mutant (grey bars) grown in the absence or presence of

antibiotics, the generation time in TSB for the WT strain was 26 min.

**B)** CFU in TSB after 24 and 48 hours for the WT(white bars)

and the  $\Delta$ agrA mutant (grey bars) **C)** CFU after 48 hours for the

WT (white bars) and the  $\Delta$ agrA mutant (grey bars) grown in the

presence of antibiotics. (mean with error bars indicating 95%

confidence intervals are presented in A, B and C).
