# Supplementary material for: Antibiotic-Mediated Selection of Quorum-Sensing-Negative Staphylococcus aureus
Source: PubMed Central journal article supplement — mBio. 2012 Nov 13;3(6):e00459-12. doi: 10.1128/mBio.00459-12 (PMC3509436; doi:10.1128/mbio.00459-12), 2012-11-13
Supplement: mbo006121379st1.pdf [file mbo006121379st1.pdf]

**Table S1****MIC (E-test results)**

| Strain       | Ciprofloxacin    | Mupirocin         | Rifampicin        | Vancomycin |
|--------------|------------------|-------------------|-------------------|------------|
| WT           | 0.125-0.19 µg/ml | 0.064-0.094 µg/ml | 0.004-0.006 µg/ml | 1.0 µg/ml  |
| <i>ΔagrA</i> | 0.125-0.19 µg/ml | 0.064-0.094 µg/ml | 0.003-0.006 µg/ml | 1.0 µg/ml  |

## E-test MIC determination

| Strain       | Ciprofloxacin | Mupirocin       | Rifampicin  | Vancomycin |
|--------------|---------------|-----------------|-------------|------------|
| WT           | 1.5 µg/ml     | 0.3 - 0.4 µg/ml | 0.064 µg/ml | 1.5 µg/ml  |
| <i>ΔagrA</i> | 1.5 µg/ml     | 0.3 - 0.4 µg/ml | 0.064 µg/ml | 1.5 µg/ml  |
| ATCC 25923   | 2.0 µg/ml     | 0.3 µg/ml       | 0.064 µg/ml | 1.0 µg/ml  |

## Liquid MIC determination
