# Supplementary material for: Antibiotic-Mediated Selection of Quorum-Sensing-Negative Staphylococcus aureus
Source: PubMed Central journal article supplement — mBio. 2012 Nov 13;3(6):e00459-12. doi: 10.1128/mBio.00459-12 (PMC3509436; doi:10.1128/mbio.00459-12), 2012-11-13
Supplement: mbo006121379st2.pdf [file mbo006121379st2.pdf]

**TABEL S2****Strains used in the study**

| Strain / plasmid     | Relevant characteristics                                                                  | Reference                           |
|----------------------|-------------------------------------------------------------------------------------------|-------------------------------------|
| WP244                | NCTC 8178 Wild-type Newman                                                                | (1)                                 |
| Newman-agr<br>WP 258 | $\Delta agrA::Tn551$<br>WP244, transformed with pTX:<br>RNAIII from (4)                   | (2)<br>This study                   |
| WP 262               | WP244, transformed pTX: No<br>insert from (4)                                             | This study                          |
| WP 264               | WP244, transformed pTX: <i>agrA</i><br>from (4)                                           | This study                          |
| WP 298               | Newman (NCTC 8178),<br>$\Delta agrA::Tn551$ transduced from<br>Newman-agr (2)             | This study                          |
| ATCC 25923           | MIC reference strain                                                                      | American Type Culture<br>Collection |
| WA400                | 8325-4: $\Delta RNAIII$ region:: <i>cat86</i>                                             | (3)                                 |
| WP418                | Newman (NCTC 8178),<br>$\Delta RNAIII$ region:: <i>cat86</i> transduced<br>from WA400 (3) | This study                          |
| WP422                | WP418, transformed pTX: <i>agrA</i><br>from (4)                                           | This study                          |
| WP424                | WP418, transformed pTX: No<br>insert from (4)                                             | This study                          |
| WP426                | WP418, transformed with pTX:<br>RNAIII from (4)                                           | This study                          |
| pTX: No insert       |                                                                                           | (4)                                 |
| pTX: RNAIII          | RNAIII expression                                                                         | (4)                                 |
| pTX: <i>agrA</i>     | <i>agrA</i> expression                                                                    | (4)                                 |

## Supplementary References

- (1) Duthie, E. S. and L. L. Lorenz (1952). "Staphylococcal coagulase; mode of action and antigenicity." *J Gen Microbiol* 6(1-2): 95-107.
- (2) Pohl, K., P. Francois, et al. (2009). "CodY in *Staphylococcus aureus*: a regulatory link between metabolism and virulence gene expression." *J Bacteriol* 191(9): 2953-2963.
- (3) Janzon, L. and S. Arvidson (1990). "The role of the delta-lysin gene (*hld*) in the regulation of virulence genes by the accessory gene regulator (*agr*) in *Staphylococcus aureus*." *EMBO J* 9(5): 1391-1399.
- (4) Queck, S. Y., M. Jameson-Lee, et al. (2008). "RNAIII-independent target gene control by the *agr* quorum-sensing system: insight into the evolution of virulence regulation in *Staphylococcus aureus*." *Mol Cell* 32(1): 150-158.
