# Supplementary material for: Antibiotic-Mediated Selection of Quorum-Sensing-Negative Staphylococcus aureus
Source: PubMed Central journal article supplement — mBio. 2012 Nov 13;3(6):e00459-12. doi: 10.1128/mBio.00459-12 (PMC3509436; doi:10.1128/mbio.00459-12), 2012-11-13
Supplement: mbo006121379st3.pdf [file mbo006121379st3.pdf]

**Table S3****Primers**

| Name                       | Purpose     | Sequence (5'-3')            |
|----------------------------|-------------|-----------------------------|
| RNAIII New for<br>primer 2 | qPCR primer | GGAGGGGCTCACGACCAT          |
| RNAIII_Rev C               | qPCR primer | TAAAATGGATTATCGACACAGTGA    |
| For IleS A                 | qPCR primer | TTAGAAAAAATAAAGGTAACGAAACAT |
| Rew IleS A                 | qPCR primer | GTAAACCATGTGTATCCCAACCTG    |
| PYK F                      | qPCR primer | AGGTTGAACTCCCCAAACAA        |
| PYK R                      | qPCR primer | GCAGCCCAAGATTACAAAAA        |
